# Supplementary material for: Controlling Avian Influenza Virus in Bangladesh: Challenges and Recommendations
Source: PubMed Central journal article supplement (PMC7412482; doi:10.3390/v12070751), 2020-07-12
Supplement: viruses-12-00751-s001.pdf [file viruses-12-00751-s001.pdf]

Supplementary

# Controlling Avian Influenza Virus in Bangladesh: Challenges and Recommendations

Rokshana Parvin <sup>1</sup>, Mohammed Nooruzzaman <sup>1</sup>, Congriev Kumar Kabiraj <sup>1</sup>, Jahan Ara Begum <sup>1</sup>, Emdadul Haque Chowdhury <sup>1</sup>, Mohammad Rafiqul Islam <sup>1</sup> and Timm Harder <sup>2,\*</sup>

<sup>1</sup> Department of Pathology, Faculty of Veterinary Science, Bangladesh Agricultural University, Mymensingh 2202, Bangladesh; rokshana.parvin@bau.edu.bd (R.P.); mohammed.nooruzzaman@bau.edu.bd (M.N.); congriev@bau.edu.bd (C.K.K.); jahan.begum@bau.edu.bd (J.A.B.); emdad001@yahoo.com (E.H.C.); mrislam\_bau@yahoo.com (M.R.I.)

<sup>2</sup> National Reference Laboratory for Avian Influenza (NRL-AI), Institute of Diagnostic Virology, Friedrich-Loeffler-Institute, Federal Research Institute for Animal Health, Suedufer 10, 17493 Greifswald-Insel Riems, Germany

\* Correspondence: Timm.Harder@fli.de

**Abstract:** Avian influenza virus (AIV) remains a huge challenge for poultry production with negative repercussions for micro- and macro-economy and public health in Bangladesh. High (HP) H5N1 and low pathogenicity (LP) H9N2 AIV are currently endemic in poultry and both have been reported to infect humans sporadically. Multiple virus introductions of different clades of HPAIV H5N1, reassorted genotypes and on-going diversification of LPAIV H9N2 create a highly volatile virological environment which potentially implicates increased virulence, adaptation to new host species and subsequent zoonotic transmission. Allotropy of poultry rearing systems and supply chains further increase the risk of virus spreading which leads to human exposure and fosters the emergence of new potentially pre-pandemic virus strains. Here we review the epidemiology, focusing on (i) risk factors for virus spreading, (ii) viral genetic evolution, and (iii) options for AIV control in Bangladesh. It is concluded that improved control strategies would profit from the integration of various intervention tools including effective vaccination, enhanced biosecurity practice, and improved awareness of producers and traders, although widespread household poultry rearing significantly interferes with any such strategies. Nevertheless, continuous surveillance associated with rapid diagnosis and thorough virus characterization is the basis of such strategies.

**Keywords:** Bangladesh; poultry; live bird market; avian influenza virus; geno- and pathotype; control

**Table S1.** Avian influenza virus HA subtypes detected in Bangladesh (based on sequences available in public databases).

| HA subtypes | Subtype combination | Number of isolates/strains | Host                   | Year of collection     |
|-------------|---------------------|----------------------------|------------------------|------------------------|
| H1          | H1N1                | 4                          | Domestic duck          | 2009, 2010             |
|             | H1N3                | 1                          | Domestic duck          | 2010                   |
|             | H1N5                | 1                          | Domestic duck          | 2013                   |
| H2          | H2N4                | 4                          | Domestic duck          | 2011                   |
|             | H2N5                | 1                          | Domestic duck          | 2013                   |
|             | H3N1                | 5                          | Domestic duck          | 2017                   |
| H3          | H3N2                | 5                          | Domestic duck          | 2010, 2011, 2016, 2017 |
|             | H3N6                | 6                          | Domestic and wild duck | 2010, 2015             |

|        |       |     |                                                                                                                                              |                                       |
|--------|-------|-----|----------------------------------------------------------------------------------------------------------------------------------------------|---------------------------------------|
|        | H3N8  | 7   | Domestic duck                                                                                                                                | 2009, 2016, 2018                      |
| H4     | H4N2  | 3   | Domestic duck                                                                                                                                | 2010, 2017                            |
|        | H4N6  | 9   | Domestic duck                                                                                                                                | 2008, 2009, 2010,<br>2015, 2017, 2018 |
|        | H5N1  | 282 | Chicken,<br>domestic duck,<br>quail, turkey,<br>goose, crow,<br>migratory<br>birds, other<br>avian &<br>poultry,<br>human and<br>environment | 2007–2018                             |
| H5     | H5N2  | 6   | Chicken,<br>domestic duck                                                                                                                    | 2009, 2016, 2018                      |
|        | H5N3  | 1   | Environment                                                                                                                                  | 2017                                  |
|        | H5N6  | 10  | Chicken,<br>domestic and<br>wild duck,<br>wild goose                                                                                         | 2017                                  |
|        | H6N1  | 2   | Domestic and<br>wild duck                                                                                                                    | 2008, 2015                            |
| H6     | H6N2  | 1   | Domestic duck                                                                                                                                | 2016                                  |
|        | H6N7  | 1   | waterfowl                                                                                                                                    | 2013                                  |
|        | H7N1  | 5   | Domestic and<br>Wild duck                                                                                                                    | 2015, 2016                            |
| H7     | H7N2  | 1   | Domestic duck                                                                                                                                | 2016                                  |
|        | H7N5  | 1   | Wild bird<br>(black tailed<br>godwit)                                                                                                        | 2015                                  |
|        | H7N6  | 1   | Domestic duck                                                                                                                                | 2018                                  |
|        | H7N9  | 5   | Domestic and<br>wild duck,<br>environment                                                                                                    | 2010, 2012, 2015                      |
|        | H8    | -   | -                                                                                                                                            | -                                     |
| H9     | H9N2  | 201 | Chicken,<br>domestic duck,<br>quail, pigeon,<br>other avian &<br>poultry,<br>environment,<br>and human                                       | 2006–2018                             |
| H10    | H10N1 | 1   | Domestic duck                                                                                                                                | 2014                                  |
|        | H10N6 | 1   | Domestic duck                                                                                                                                | 2015                                  |
|        | H10N7 | 4   | Domestic<br>duck, chicken                                                                                                                    | 2009                                  |
|        | H10N9 | 2   | Domestic duck                                                                                                                                | 2010                                  |
| H11    | H11N3 | 9   | Domestic<br>duck,<br>environment                                                                                                             | 2007, 2009, 2010                      |
| H12–14 | -     | -   | -                                                                                                                                            | -                                     |
| H15    | H15N9 | 2   | Wild duck                                                                                                                                    | 2015                                  |
| H16    | -     | -   | -                                                                                                                                            | -                                     |

**Table S2.** Avian influenza virus NA subtypes detected in Bangladesh (based on sequences available in public databases).

| NA subtypes | Subtype combination | Number of isolates/strains | Host                                                                                                              | Year of collection                 |
|-------------|---------------------|----------------------------|-------------------------------------------------------------------------------------------------------------------|------------------------------------|
| N1          | H1N1                | 4                          | Domestic duck                                                                                                     | 2009, 2010                         |
|             | H3N1                | 5                          | Domestic duck                                                                                                     | 2017                               |
|             | H5N1                | 282                        | Chicken, domestic duck, quail, turkey, goose, crow, migratory birds, other avian & poultry, human and environment | 2007–2018                          |
|             | H6N1                | 2                          | Domestic duck                                                                                                     | 2008, 2015                         |
|             | H7N1                | 5                          | Domestic and wild duck                                                                                            | 2015, 2016                         |
|             | H10N1               | 1                          | Domestic duck                                                                                                     | 2014                               |
| N2          | H3N2                | 5                          | Domestic duck                                                                                                     | 2010, 2011, 2016, 2017             |
|             | H4N2                | 3                          | Domestic duck                                                                                                     | 2010, 2017                         |
|             | H5N2                | 6                          | Chicken, duck                                                                                                     | 2009, 2016, 2018                   |
|             | H6N2                | 1                          | Domestic duck                                                                                                     | 2016                               |
|             | H7N2                | 1                          | Domestic duck                                                                                                     | 2016                               |
|             | H9N2                | 201                        | Chicken, domestic duck, quail, pigeon, other avian & poultry, human, and environment                              | 2006–2018                          |
| N3          | H1N3                | 1                          | Domestic duck                                                                                                     | 2010                               |
|             | H5N3                | 1                          | Environment                                                                                                       | 2017                               |
|             | H11N3               | 9                          | Domestic duck, environment                                                                                        | 2007, 2009, 2010                   |
| N4          | H2N4                | 4                          | Domestic duck                                                                                                     | 2011                               |
| N5          | H1N5                | 1                          | Domestic duck                                                                                                     | 2013                               |
|             | H2N5                | 1                          | Domestic duck                                                                                                     | 2013                               |
|             | H7N5                | 1                          | Wild bird (black tailed godwit)                                                                                   | 2015                               |
| N6          | H3N6                | 6                          | Domestic and wild duck                                                                                            | 2010, 2015                         |
|             | H4N6                | 9                          | Domestic duck                                                                                                     | 2008, 2009, 2010, 2015, 2017, 2018 |
|             | H5N6                | 10                         | Chicken, domestic and wild duck, wild goose                                                                       | 2017                               |
|             | H10N6               | 1                          | Domestic duck                                                                                                     | 2015                               |
| N7          | H6N7                | 1                          | Waterfowl                                                                                                         | 2013                               |
|             | H10N7               | 4                          | Domestic duck                                                                                                     | 2009                               |
| N8          | H3N8                | 6                          | Domestic duck                                                                                                     | 2009, 2016, 2018                   |
| N9          | H7N9                | 4                          | Domestic and wild duck, environment                                                                               | 2010, 2012, 2015                   |
|             | H10N9               | 2                          | Domestic duck                                                                                                     | 2010                               |
|             | H15N9               | 2                          | Wild duck                                                                                                         | 2015                               |
